# Supplementary material for: MUSIC: identification of enriched regions in ChIP-Seq experiments using a mappability-corrected multiscale signal processing framework
Source: Springer Nature journal article supplement (doi:10.1186/s13059-014-0474-3), 2014-10-07

# Figure 4

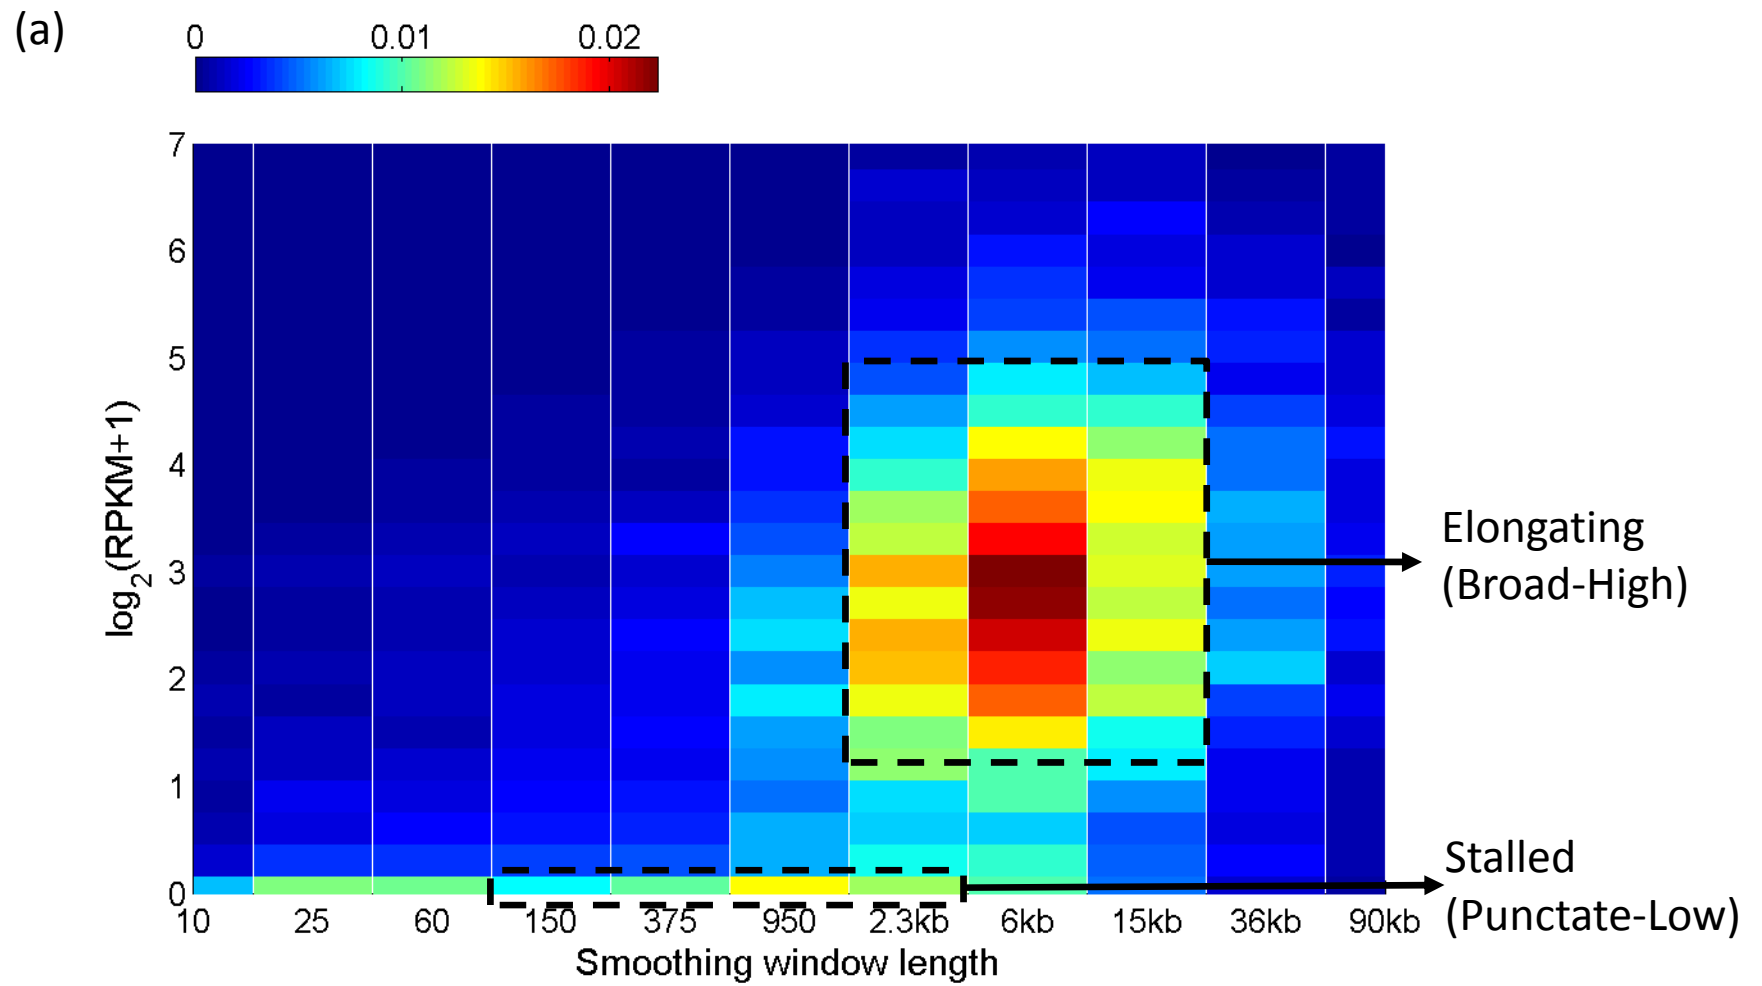

Supplement: 13059_2014_474_MOESM8_ESM.pdf [file 13059_2014_474_MOESM8_ESM.pdf]
